# Supplementary material
Source: Royal Society of Chemistry journal article supplement (doi:10.1039/d6dt00929h)
Supplement: d6dt00929h1.pdf [file d6dt00929h1.pdf]

## Supporting Information

### **Aromatic Guest–Induced Layer Expansion and Phase Switching in a 2D Square Lattice Coordination Network**

*Shi-Qiang Wang,<sup>\*a</sup> Shaza Darwish,<sup>b</sup> Shan Xu,<sup>a</sup> Rong Wang,<sup>\*a</sup>, and Michael J. Zaworotko<sup>\*b</sup>*

*<sup>a</sup>Singapore Membrane Technology Centre, Nanyang Environment and Water Research Institute, Nanyang Technological University, 1  
Cleantech Loop, 637141, Singapore.*

*<sup>b</sup>Bernal Institute and Department of Chemical Sciences, University of Limerick, Limerick V94 T9PX, Republic of Ireland.*

*\*E-mail: [shiqiang.wang@ntu.edu.sg](mailto:shiqiang.wang@ntu.edu.sg); [rwang@ntu.edu.sg](mailto:rwang@ntu.edu.sg); [xtal@ul.ie](mailto:xtal@ul.ie)*

Table S1. Crystallographic data of **sql-1-M-NCS·xG**.

|                       | <b>sql-1-Fe-NCS·2MB</b>                                                                                                               | <b>sql-1-Co-NCS·2NB</b>                                                                                                                               | <b>sql-1-Co-NCS·3TMB</b>                                                                                                               |
|-----------------------|---------------------------------------------------------------------------------------------------------------------------------------|-------------------------------------------------------------------------------------------------------------------------------------------------------|----------------------------------------------------------------------------------------------------------------------------------------|
| Formula               | [Fe(C <sub>10</sub> H <sub>8</sub> N <sub>2</sub> ) <sub>2</sub> (NCS) <sub>2</sub> ] <sub>2</sub> ·2(C <sub>7</sub> H <sub>8</sub> ) | [Co(C <sub>10</sub> H <sub>8</sub> N <sub>2</sub> ) <sub>2</sub> (NCS) <sub>2</sub> ] <sub>2</sub> ·2(C <sub>6</sub> H <sub>5</sub> NO <sub>2</sub> ) | [Co(C <sub>10</sub> H <sub>8</sub> N <sub>2</sub> ) <sub>2</sub> (NCS) <sub>2</sub> ] <sub>3</sub> ·3(C <sub>9</sub> H <sub>12</sub> ) |
| Formula weight        | 668.64                                                                                                                                | 733.68                                                                                                                                                | 848.01                                                                                                                                 |
| Temperature/K         | 100                                                                                                                                   | 273                                                                                                                                                   | 100                                                                                                                                    |
| Crystal system        | Monoclinic                                                                                                                            | Monoclinic                                                                                                                                            | Triclinic                                                                                                                              |
| Space group           | <i>C2/c</i>                                                                                                                           | <i>C2/c</i>                                                                                                                                           | <i>P-1</i>                                                                                                                             |
| <i>a</i> /Å           | 21.3414                                                                                                                               | 22.496                                                                                                                                                | 11.4865                                                                                                                                |
| <i>b</i> /Å           | 11.5792                                                                                                                               | 11.500                                                                                                                                                | 11.5252                                                                                                                                |
| <i>c</i> /Å           | 12.9982                                                                                                                               | 13.512                                                                                                                                                | 17.5412                                                                                                                                |
| <i>α</i> /°           | 90                                                                                                                                    | 90                                                                                                                                                    | 77.040                                                                                                                                 |
| <i>β</i> /°           | 99.3030                                                                                                                               | 105.196                                                                                                                                               | 86.422                                                                                                                                 |
| <i>γ</i> /°           | 90                                                                                                                                    | 90                                                                                                                                                    | 88.358                                                                                                                                 |
| Volume/Å <sup>3</sup> | 3169.8                                                                                                                                | 3373.4                                                                                                                                                | 2258.4                                                                                                                                 |
| <i>Z</i>              | 4                                                                                                                                     | 4                                                                                                                                                     | 2                                                                                                                                      |
| CCDC No.              | 2543884                                                                                                                               | 2543885                                                                                                                                               | 2543886                                                                                                                                |

MB = methylbenzene, NB = nitrobenzene, TMB = 1,3,5-trimethylbenzene

Table S2. Physical properties of studied aromatic molecules.

| chemicals | formula                                       | M (g/mol) | bp (°C) | vapor pressure at 25 °C (kPa) |
|-----------|-----------------------------------------------|-----------|---------|-------------------------------|
| MB        | C <sub>7</sub> H <sub>8</sub>                 | 92.14     | 110.6   | 3.79                          |
| EB        | C <sub>8</sub> H <sub>10</sub>                | 106.17    | 136     | 1.33                          |
| NB        | C <sub>6</sub> H <sub>5</sub> NO <sub>2</sub> | 123.11    | 210.9   | 0.03                          |
| TFT       | C <sub>7</sub> H <sub>5</sub> F <sub>3</sub>  | 146.11    | 103.5   | 1.5                           |
| TMB       | C <sub>9</sub> H <sub>12</sub>                | 120.19    | 164.7   | 0.33                          |
| OX        | C <sub>8</sub> H <sub>10</sub>                | 106.17    | 144.4   | 0.88                          |
| MX        | C <sub>8</sub> H <sub>10</sub>                | 106.17    | 139     | 1.12                          |
| PX        | C <sub>8</sub> H <sub>10</sub>                | 106.17    | 138     | 1.18                          |

Table S3. Aromatic guest-induced layer expansion of **sql-1-M-A**.

| Compounds                                | Interlayer distance (Å) | Reported Year | Refcode |
|------------------------------------------|-------------------------|---------------|---------|
| sql-1-Cd-NO <sub>3</sub> ·2DBB           | 6.35                    | 1994          | YECFAN  |
| sql-1-Cd-NO <sub>3</sub> ·2 <i>o</i> -NA | 6.11                    | 1999          | DIDLIL  |
| sql-1-Co-NO <sub>3</sub> ·3Nap           | 7.81                    | 1999          | QOZLAS  |
| sql-1-Ni-NO <sub>3</sub> ·3Nap           | 7.76                    | 1999          | QOZLEW  |
| sql-1-Ni-NO <sub>3</sub> ·2pyrene        | 7.91                    | 1999          | GOSSEM  |
| sql-1-Ni-NO <sub>3</sub> ·2DCB           | 6.24                    | 2000          | METMON  |
| sql-1-Ni-NO <sub>3</sub> ·2Bz            | 5.89                    | 2000          | METMUT  |
| sql-1-Ni-NO <sub>3</sub> ·2NB            | 6.04                    | 2000          | METNAA  |
| sql-1-Co-NO <sub>3</sub> ·2DCB           | 6.19                    | 2000          | METNEE  |

|                                                |      |      |          |
|------------------------------------------------|------|------|----------|
| sql-1-Co-NO <sub>3</sub> ·2Bz                  | 5.83 | 2000 | METNII   |
| sql-1-Co-NO <sub>3</sub> ·2NB                  | 6.00 | 2000 | METNOO   |
| sql-1-Co-NO <sub>3</sub> ·2MB                  | 6.01 | 2000 | METNUU   |
| sql-1-Co-NO <sub>3</sub> ·3An                  | 7.72 | 2000 | METPAC   |
| sql-1-Ni-NO <sub>3</sub> ·2CB                  | 6.05 | 2000 | METPEG   |
| sql-1-Co-NO <sub>3</sub> ·2CB                  | 6.02 | 2000 | METPIK   |
| sql-1-Cu-NO <sub>3</sub> ·3PABA                | 8.84 | 2000 | LONTAJ   |
| sql-1-Co-NO <sub>3</sub> ·2 <i>p</i> -NA       | 6.24 | 2001 | ODAGOP   |
| sql-1-Ni-NO <sub>3</sub> ·2 <i>p</i> -NA       | 6.32 | 2001 | ODAGUV   |
| sql-1-Zn-NO <sub>3</sub> ·2 <i>p</i> -NA       | 6.26 | 2001 | ODAHAC   |
| sql-1-Zn-NO <sub>3</sub> ·pyrene·2DCB          | 8.15 | 2007 | XIJQUD   |
| sql-1-Cd-NCS·PTDS                              | 9.06 | 2009 | MUFTIR   |
| sql-1-Fe-NCS·2MB                               | 5.92 | 2010 | QAGWAY   |
| sql-1-Fe-NCS·2NB                               | 6.19 | 2010 | QAGWEC   |
| sql-1-Co-NCS·2TFT                              | 6.63 | 2018 | VIBQOP   |
| sql-1-Co-NCS·4OX                               | 9.26 | 2019 | KODDUF   |
| sql-1-Co-NCS·4MX                               | 9.21 | 2019 | KODFAN   |
| sql-1-Co-NCS·4PX                               | 9.15 | 2019 | KODFER   |
| sql-1-Co-NCS·2EB                               | 6.25 | 2019 | KODFIV   |
| sql-1-Co-NCS·4OX                               | 9.58 | 2023 | VEQNIS02 |
| sql-1-Cu-CF <sub>3</sub> CO <sub>2</sub> ·2TFT | 7.70 | 2025 | ZADTAE   |
| sql-1-Cu-CF <sub>3</sub> CO <sub>2</sub> ·2OX  | 7.66 | 2025 | ZADTEI   |
| sql-1-Cu-CF <sub>3</sub> CO <sub>2</sub> ·2MX  | 7.80 | 2025 | ZADTIM   |
| sql-1-Cu-CF <sub>3</sub> CO <sub>2</sub> ·1PX  | 6.83 | 2025 | ZADTOS   |

DBB = *o*-dibromobenzene; *o*-NA = *o*-nitroaniline; Nap = naphthalene; DCB = *o*-dichlorobenzene; Bz = benzene; NB = nitrobenzene; MB = methylbenzene (toluene); An = anisole; CB = chlorobenzene; PAPB = 4-aminobenzic acid; *p*-NA = *p*-nitroaniline; PTDS = *p*-toyldisulfide; TFT =  $\alpha,\alpha,\alpha$ -trifluorotoluene; OX = *o*-xylene; MX = *m*-xylene; PX = *p*-xylene; EB = ethylbenzene

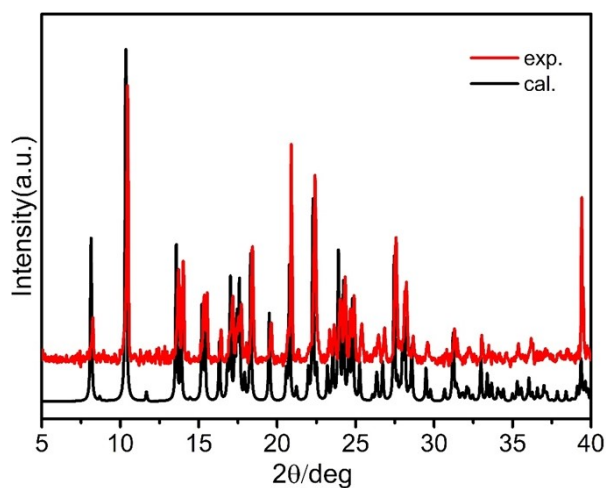

Figure S1. Calculated and experimental PXRD patterns of **sql-1-Co-NCS·2NB**.

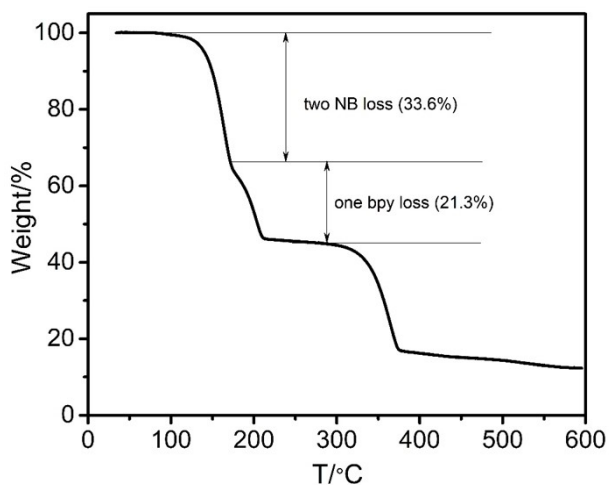

Figure S2. TGA curve of **sql-1-Co-NCS·2NB**.

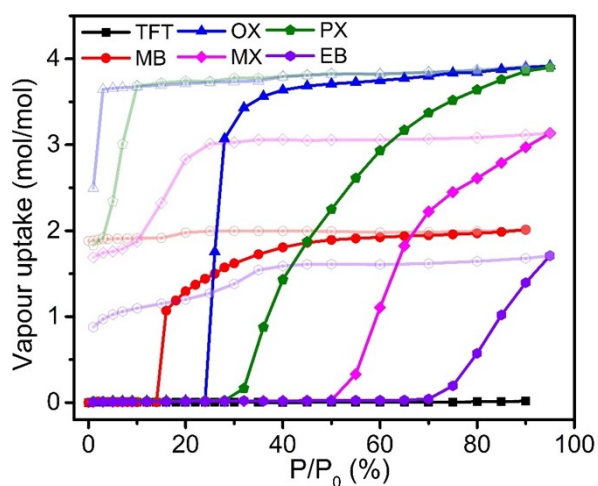

Figure S3. Vapor adsorption isotherms (298 K) of **sql-1-Co-NCS**. Vapor uptake is expressed in mol/mol. Adsorption: solid symbols; desorption: open symbols.
